# Supplementary material
Source: MDPI journal article supplement (https://www.mdpi.com/2673-7426/2/1/4)
Supplement: s1 [file s1]

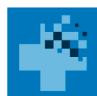

# Supplementary Materials: Supervised projection of high-dimensional genome-wide expression on SOM transcriptome

Maria Nikoghosyan, Henry Loeffler-Wirth, Suren Davidavyan, Hans Binder and Arsen Arakelyan

## Text S1. Parameters used for generation of simulated datasets using 'madsim' R package.

Simulated datasets were generated using 'madsim' R package with following command and parameters:

```
fparams = data.frame(m1=m1,m2=m2,shape2=4,lb=4,ub=14,pde=0.025,sym=0.5)
dparams = data.frame(lambda1=0.13, lambda2=2, muminde=1, sdde=0.5)
dat = madsim(mdata = NULL, n = 10000, ratio = 0, fparams, dparams, sdn = 0.7, rseed = 50).
```

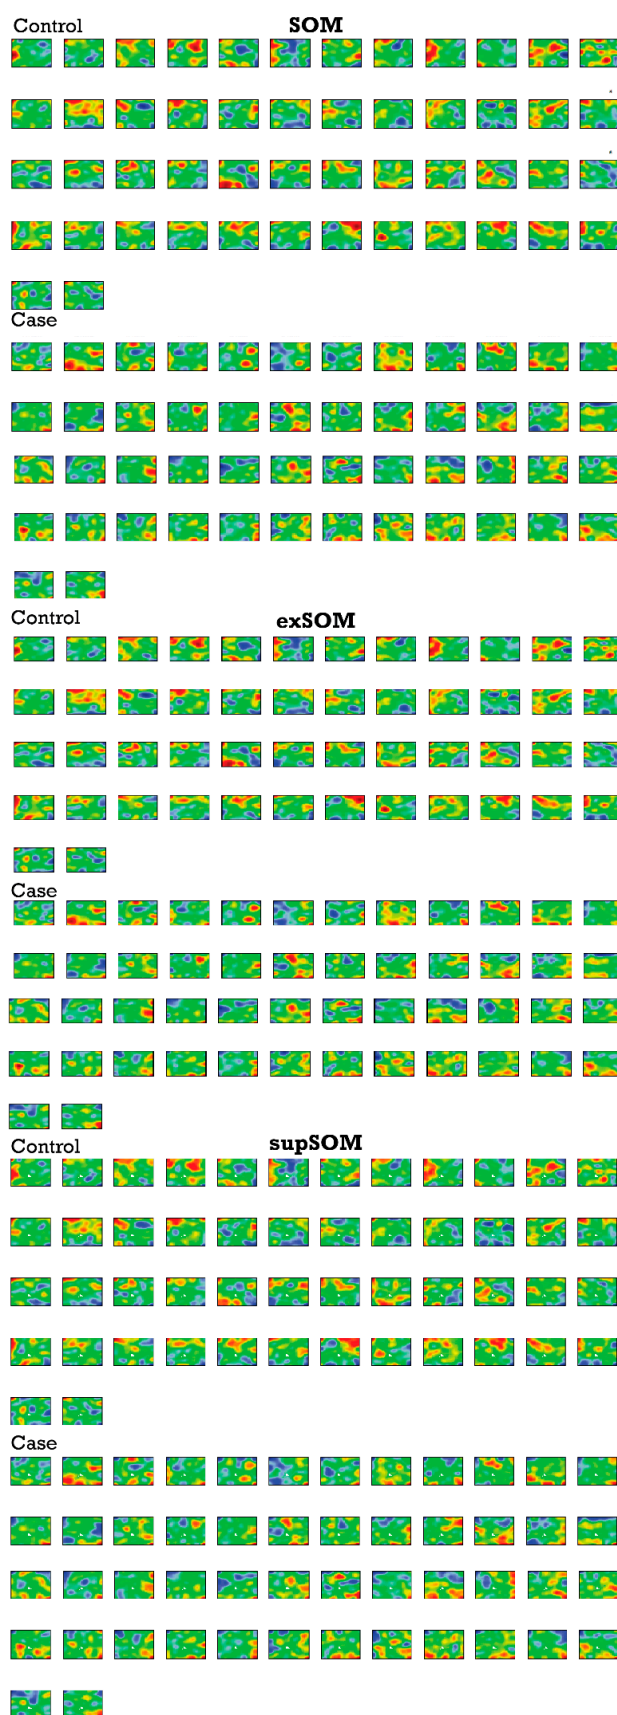

**Figure S1.** Complete portrayal of simulated dataset with SOM, exSOM, and supSOM.

# SOM difference portraits

## baseline vs placebo

### Global Summary

%DE = 0.25  
# genes with  $\text{fdr} < 0.2 = 551$  (227 + / 324 -)  
# genes with  $\text{fdr} < 0.1 = 0$  (0 + / 0 -)  
# genes with  $\text{fdr} < 0.05 = 0$  (0 + / 0 -)  
# genes with  $\text{fdr} < 0.01 = 0$  (0 + / 0 -)

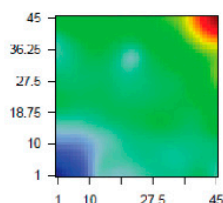

Differentially expressed genes

| Rank ID       | log(FC)    | fdr p-value    | Description Metagene                                        |
|---------------|------------|----------------|-------------------------------------------------------------|
| Overexpressed |            |                |                                                             |
| 1             | 1560019_at | 0.05 2e-07 0.2 | 16 x 18 DLGAP1 antisense RNA 2                              |
| 2             | 1570482_at | 0.02 3e-05 0.2 | 11 x 38                                                     |
| 3             | ERMN       | 0.02 4e-05 0.2 | 31 x 36 ermin                                               |
| 4             | 240232_at  | 0.07 4e-05 0.2 | 38 x 42                                                     |
| 5             | SLFN5      | 0.08 5e-05 0.2 | 37 x 44 schlafen family member 5                            |
| 6             | NETO2      | 0.08 6e-05 0.2 | 36 x 40 neuropilin and tolloid like 2                       |
| 7             | PITPNC1    | 0.05 8e-05 0.2 | 37 x 38 phosphatidylinositol transfer protein cytoplasmic 1 |
| 8             | LAMC2      | 0.05 8e-05 0.2 | 8 x 37 laminin subunit gamma 2                              |
| 9             | NETO2      | 0.07 8e-05 0.2 | 36 x 41 neuropilin and tolloid like 2                       |
| 10            | 240137_at  | 0.05 9e-05 0.2 | 37 x 40                                                     |

| Rank                  | log(FC)    | fdr                     | Description                                      |
|-----------------------|------------|-------------------------|--------------------------------------------------|
| ID                    | p-value    | Metagene                |                                                  |
| <i>Underexpressed</i> |            |                         |                                                  |
| 1                     | ZDHHC1     | -0.03 2e-05 0.2 34 x 7  | zinc finger DHHC-type containing 1               |
| 2                     | SIDT2      | -0.03 2e-05 0.2 10 x 9  | SID1 transmembrane family member 2               |
| 3                     | 1562799_at | -0.02 3e-05 0.2 26 x 26 |                                                  |
| 4                     | CNGA1      | -0.04 5e-05 0.2 9 x 10  | cyclic nucleotide gated channel subunit alpha 1  |
| 5                     | MARCHF3    | -0.03 5e-05 0.2 17 x 8  | membrane associated ring-CH-type finger 3        |
| 6                     | GATAD1     | -0.04 6e-05 0.2 21 x 32 | GATA zinc finger domain containing 1             |
| 7                     | ADPRHL1    | -0.03 6e-05 0.2 8 x 12  | ADP-ribosylhydrolase like 1                      |
| 8                     | ATG10      | -0.02 6e-05 0.2 21 x 3  | autophagy related 10                             |
| 9                     | OR2F1      | -0.02 8e-05 0.2 19 x 4  | olfactory receptor family 2 subfamily F member 1 |
| 10                    | MMP28      | -0.06 1e-04 0.2 7 x 4   | matrix metalloproteinase 28                      |

## baseline vs responder

### Global Summary

%DE = 0.5  
# genes with  $\text{fdr} < 0.2 = 17842$  (7633 + / 10209 -)  
# genes with  $\text{fdr} < 0.1 = 13973$  (6031 + / 7942 -)  
# genes with  $\text{fdr} < 0.05 = 11095$  (4819 + / 6276 -)  
# genes with  $\text{fdr} < 0.01 = 6968$  (3155 + / 3813 -)

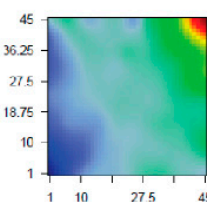

Differentially expressed genes

| Rank ID       | log(FC)     | fdr p-value | Description Metagene                                                    |
|---------------|-------------|-------------|-------------------------------------------------------------------------|
| Overexpressed |             |             |                                                                         |
| 1             | S100A9      | 0.41        | 7e-14 1e-09 45 x 45 S100 calcium binding protein A9                     |
| 2             | 214370_at   | 0.34        | 7e-14 1e-09 45 x 45                                                     |
| 3             | SOD2        | 0.21        | 1e-13 1e-08 45 x 45 superoxide dismutase 2                              |
| 4             | SOD2        | 0.24        | 6e-13 2e-08 45 x 45 superoxide dismutase 2                              |
| 5             | CXCL8       | 0.43        | 2e-12 2e-08 45 x 45 C-X-C motif chemokine ligand 8                      |
| 6             | NAMPT       | 0.17        | 3e-12 2e-08 45 x 43 nicotinamide phosphoribosyltransferase pseudogene 1 |
| 7             | 216565_x_at | 0.1         | 3e-12 2e-08 45 x 36 interferon induced transmembrane protein pseudogene |
| 8             | TNFRSF6B    | 0.21        | 3e-12 2e-08 44 x 45 RTEL1-TNFRSF6B readthrough (NMD candidate)          |
| 9             | S100A8      | 0.53        | 4e-12 2e-08 45 x 45 S100 calcium binding protein A8                     |
| 10            | DOC2B       | 0.19        | 4e-12 2e-08 45 x 29 double C2 domain beta                               |

| Rank ID               | log(FC)  | fdr p-value | Description Metagene                                         |
|-----------------------|----------|-------------|--------------------------------------------------------------|
| <i>Underexpressed</i> |          |             |                                                              |
| 1                     | MRPS25   | -0.07 8e-12 | 2e-08 1 x 9 mitochondrial ribosomal protein S25              |
| 2                     | HNRNPDL  | -0.06 5e-11 | 5e-08 1 x 31 heterogeneous nuclear ribonucleoprotein D like  |
| 3                     | MCCC1    | -0.06 8e-11 | 1e-07 1 x 11 methylcrotonoyl-CoA carboxylase 1               |
| 4                     | EFCAB14  | -0.05 1e-10 | 1e-07 9 x 9 EF-hand calcium binding domain 14                |
| 5                     | CCDC115  | -0.06 1e-10 | 1e-07 1 x 12 coiled-coil domain containing 115               |
| 6                     | SSPN     | -0.07 1e-10 | 1e-07 1 x 31 sarcomer                                        |
| 7                     | VWFA8    | -0.07 2e-10 | 1e-07 2 x 9 von Willebrand factor A domain containing 8      |
| 8                     | ANKH     | -0.07 2e-10 | 1e-07 3 x 8 ANKH inorganic pyrophosphate transport regulator |
| 9                     | DCAF4    | -0.05 3e-10 | 2e-07 2 x 33 DDB1 and CUL4 associated factor 4               |
| 10                    | PLA2G12A | -0.08 4e-10 | 3e-07 1 x 7 phospholipase A2 group X11A                      |

## placebo vs responder

### Global Summary

%DE = 0.34  
# genes with  $\text{fdr} < 0.2 = 3991$  (1758 + / 2233 -)  
# genes with  $\text{fdr} < 0.1 = 976$  (343 + / 633 -)  
# genes with  $\text{fdr} < 0.05 = 77$  (18 + / 59 -)  
# genes with  $\text{fdr} < 0.01 = 0$  (0 + / 0 -)

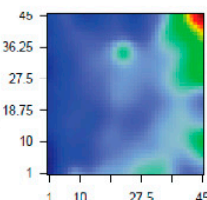

Differentially expressed genes

| Rank          | ID         | log(FC) | fdr   | p-value | Description | Metagene                                                 |
|---------------|------------|---------|-------|---------|-------------|----------------------------------------------------------|
| Overexpressed |            |         |       |         |             |                                                          |
| 1             | MYOZ3      | 0.02    | 9e-07 | 0.01    | 28 x 1      | myozenin 3                                               |
| 2             | NEUROD2    | 0.02    | 4e-06 | 0.02    | 40 x 17     | neuronal differentiation 2                               |
| 3             | MAPK8IP2   | 0.03    | 8e-06 | 0.02    | 28 x 1      | mitogen-activated protein kinase 8 interacting protein 2 |
| 4             | 1570575_at | 0.02    | 8e-06 | 0.02    | 23 x 27     |                                                          |
| 5             | 231595_at  | 0.03    | 1e-05 | 0.02    | 38 x 28     | MRV1 antisense RNA 1                                     |
| 6             | 1565805_at | 0.02    | 1e-05 | 0.02    | 39 x 17     |                                                          |
| 7             | MBP        | 0.05    | 1e-05 | 0.03    | 23 x 34     | myelin basic protein                                     |
| 8             | P4HA2      | 0.05    | 2e-05 | 0.03    | 42 x 10     | prolyl 4-hydroxylase subunit alpha 2                     |
| 9             | JAK3       | 0.03    | 3e-05 | 0.03    | 30 x 1      | Janus kinase 3                                           |
| 10            | MBP        | 0.07    | 3e-05 | 0.03    | 22 x 35     | myelin basic protein                                     |

| Rank           | ID         | log(FC) | fdr   | p-value | Description | Metagene                                             |
|----------------|------------|---------|-------|---------|-------------|------------------------------------------------------|
| Underexpressed |            |         |       |         |             |                                                      |
| 1              | EIF3J      | -0.03   | 4e-07 | 0.01    | 2 x 21      | eukaryotic translation initiation factor 3 subunit J |
| 2              | GCFC2      | -0.05   | 2e-06 | 0.01    | 1 x 29      | GC-rich sequence DNA-binding factor 2                |
| 3              | ARIH2      | -0.05   | 2e-06 | 0.01    | 1 x 19      | ariadne RBR E3 ubiquitin protein ligase 2            |
| 4              | 242607_at  | -0.05   | 2e-06 | 0.01    | 14 x 45     |                                                      |
| 5              | PNPT1      | -0.05   | 2e-06 | 0.02    | 2 x 21      | polynucleotide nucleotidyltransferase 1              |
| 6              | 1560019_at | -0.05   | 4e-06 | 0.02    | 16 x 18     | DLGAP1 antisense RNA 2                               |
| 7              | POLR3E     | -0.05   | 4e-06 | 0.02    | 1 x 31      | RNA polymerase III subunit E                         |
| 8              | RRN3       | -0.06   | 5e-06 | 0.02    | 1 x 30      | RRN3 homolog, RNA polymerase I transcription factor  |
| 9              | PUS7       | -0.06   | 5e-06 | 0.02    | 1 x 21      | pseudouridine synthase 7                             |
| 10             | GFM1       | -0.05   | 7e-06 | 0.02    | 1 x 11      | G elongation factor mitochondrial 1                  |

Figure S2. Pairwise differential gene expression in primary SOM IBD dataset (GSE23597).

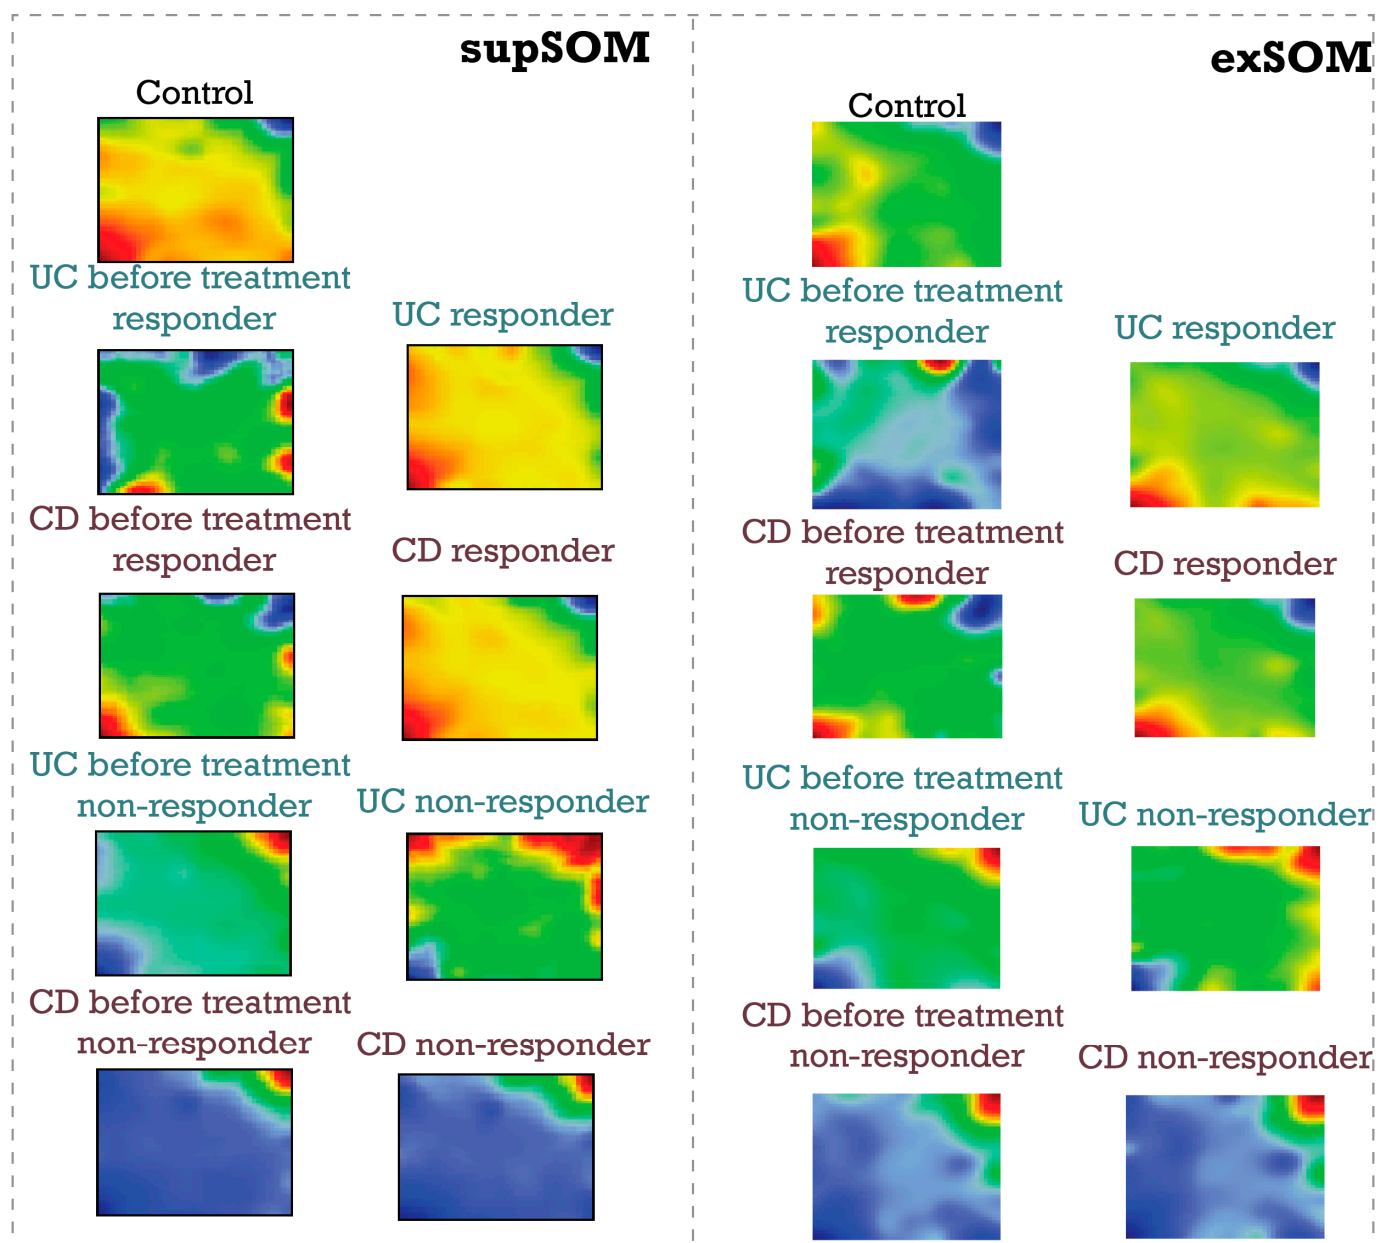

**Figure S3.** Comparison of supSOM and exSOM portraits in secondary IBD dataset (GSE16879).



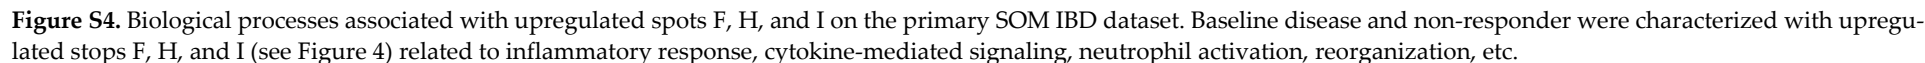

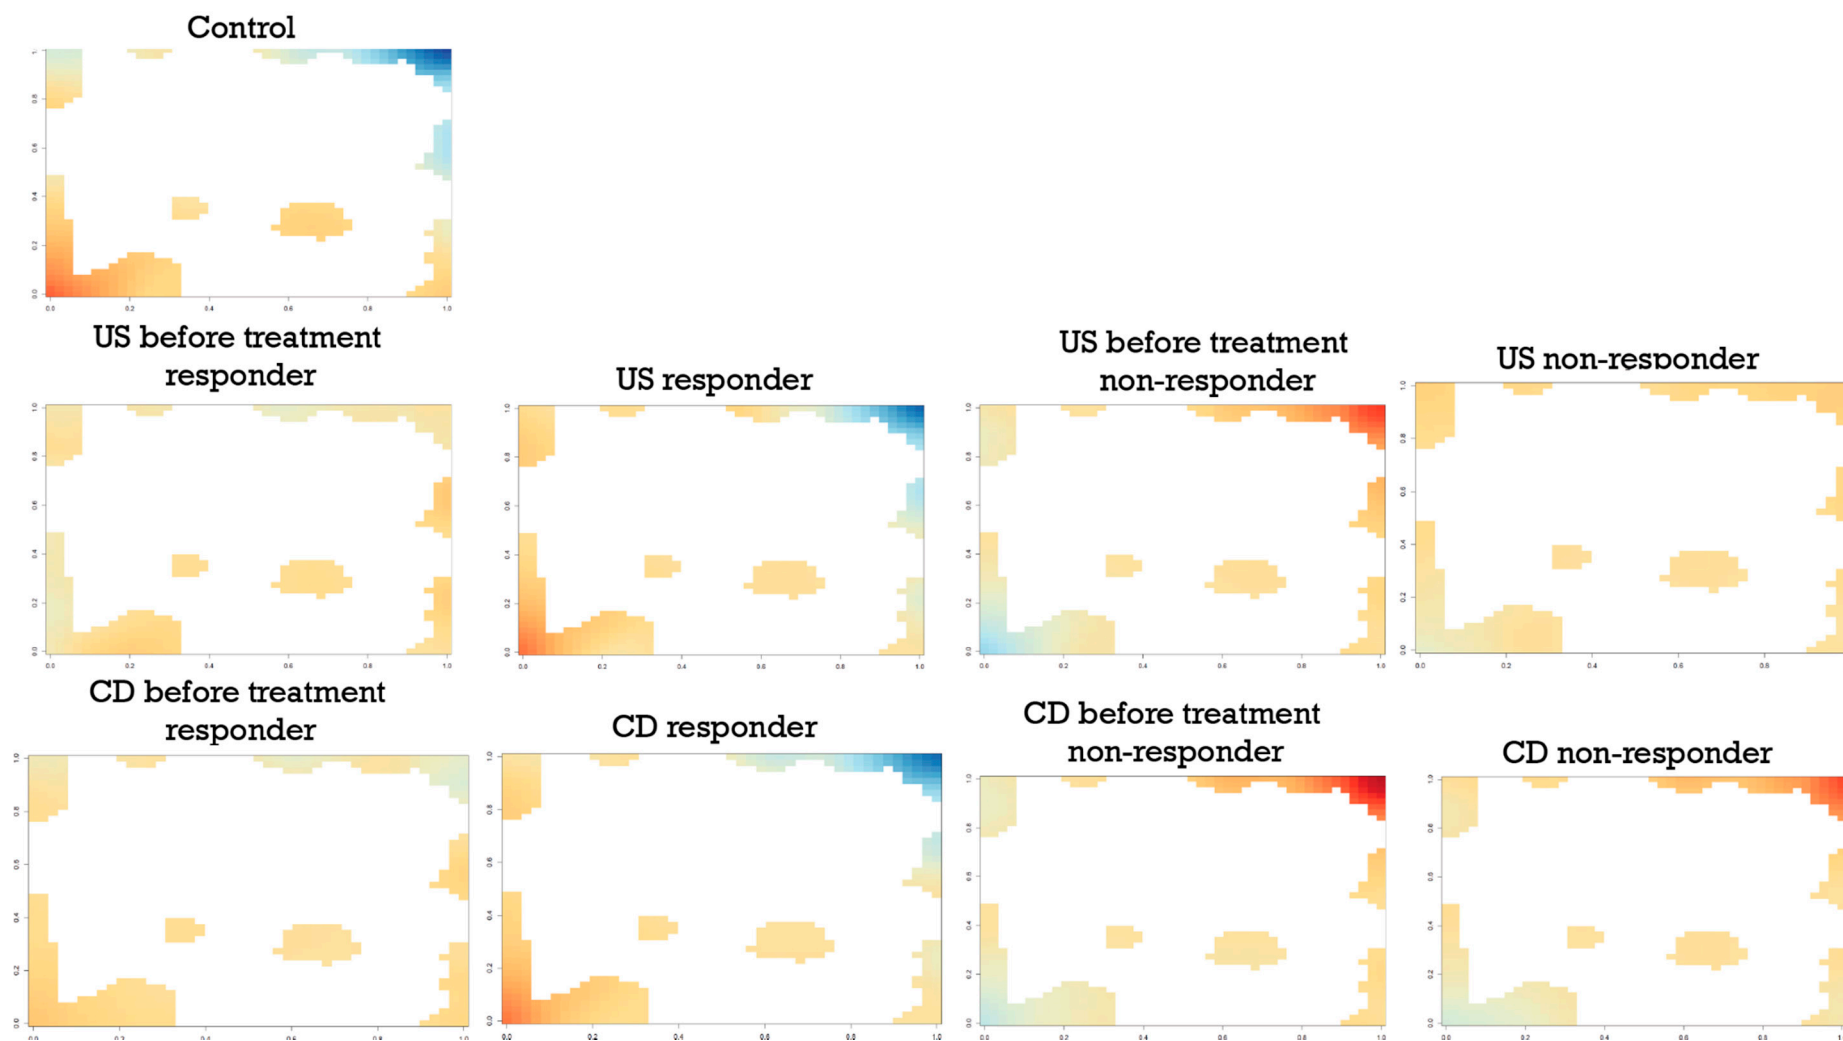

**Figure S5.** Differential expression landscape in IDB responders vs. non-responders in secondary dataset (GSE16879). Orange color indicates upregulation, blue color indicates down-regulation, white indicates region of invariant gene expression.

# Normal vs grade\_1

%DE = 0.55

# genes with fdr < 0.2 = 19871 ( 10684 + / 9187 - )  
# genes with fdr < 0.1 = 14551 ( 7476 + / 7075 - )  
# genes with fdr < 0.05 = 11160 ( 5546 + / 5614 - )  
# genes with fdr < 0.01 = 6333 ( 3094 + / 3239 - )

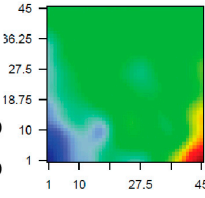

# Normal vs grade\_2

%DE = 0.52

# genes with fdr < 0.2 = 19207 ( 8776 + / 10431 - )  
# genes with fdr < 0.1 = 15572 ( 6874 + / 8698 - )  
# genes with fdr < 0.05 = 13587 ( 5848 + / 7739 - )  
# genes with fdr < 0.01 = 9743 ( 3980 + / 5763 - )

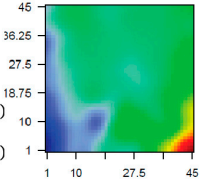

# Normal vs grade\_3

%DE = 0.57

# genes with fdr < 0.2 = 21870 ( 9877 + / 11993 - )  
# genes with fdr < 0.1 = 18014 ( 7750 + / 10264 - )  
# genes with fdr < 0.05 = 15288 ( 6337 + / 8951 - )  
# genes with fdr < 0.01 = 10728 ( 4167 + / 6571 - )

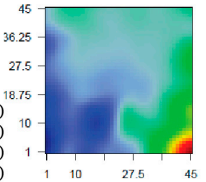

## Up-regulated in control

| Rank ID     | log(FC) | fdr      | Description                                            |
|-------------|---------|----------|--------------------------------------------------------|
|             | p-value | Metagene |                                                        |
| 1 SH3KBP1   | 2.09    | 2e-12    | 45 x 10 SH3 domain containing kinase binding protein 1 |
| 2 TMEM132C  | 2.72    | 6e-12    | 43 x 1 transmembrane protein 132C                      |
| 3 PLPP7     | 1.33    | 6e-12    | 45 x 15 phospholipid phosphatase 7 (inactive)          |
| 4 GABARAPL1 | 1.04    | 2e-11    | 45 x 28 GABA type A receptor associated protein like 1 |
| 5 HBEGF     | 1.27    | 4e-11    | 45 x 12 heparin binding EGF like growth factor         |
| 6 MLXIPL    | 1.26    | 5e-11    | 45 x 29 MLX interacting protein like                   |
| 7 SH3KBP1   | 1.83    | 8e-11    | 45 x 10 SH3 domain containing kinase binding protein 1 |
| 8 FAM89A    | 3.62    | 8e-11    | 45 x 1 family with sequence similarity 89 member A     |
| 9 BIN1      | 1.27    | 9e-11    | 45 x 28 bridging integrator 1                          |
| 10 SGK2     | 1.42    | 9e-11    | 45 x 14 serum/glucocorticoid regulated kinase 2        |

## Up-regulated in control

| Rank ID    | log(FC) | fdr      | Description                                                        |
|------------|---------|----------|--------------------------------------------------------------------|
|            | p-value | Metagene |                                                                    |
| 1 MPC1     | 1.22    | 4e-18    | 44 x 14 mitochondrial pyruvate carrier 1                           |
| 2 STAT5A   | 1.44    | 2e-17    | 45 x 12 signal transducer and activator of transcription 5A        |
| 3 CZIB     | 1.05    | 1e-16    | 44 x 15 CXXC motif containing zinc binding protein                 |
| 4 MXD1     | 0.98    | 2e-16    | 45 x 24 MAX dimerization protein 1                                 |
| 5 ADH5     | 1.13    | 3e-16    | 1e-12 44 x 12 alcohol dehydrogenase 5 (class III), chi polypeptide |
| 6 SMIM20   | 1.71    | 5e-16    | 2e-12 37 x 1 small integral membrane protein 20                    |
| 7 MIR195   | 1.1     | 8e-16    | 3e-12 45 x 30 novel transcript                                     |
| 8 ARHGAP24 | 1.5     | 1e-15    | 4e-12 45 x 12 Rho GTPase activating protein 24                     |
| 9 BIN1     | 1.12    | 2e-15    | 6e-12 45 x 28 bridging integrator 1                                |
| 10 POMP    | 0.87    | 1e-14    | 3e-11 44 x 27 proteasome maturation protein                        |

## Up-regulated in control

| Rank ID    | log(FC) | fdr      | Description                                                        |
|------------|---------|----------|--------------------------------------------------------------------|
|            | p-value | Metagene |                                                                    |
| 1 MPC1     | 1.19    | 2e-18    | 1e-14 44 x 14 mitochondrial pyruvate carrier 1                     |
| 2 CZIB     | 1.12    | 3e-18    | 6e-14 44 x 15 CXXC motif containing zinc binding protein           |
| 3 STAT5A   | 1.49    | 6e-18    | 2e-13 45 x 12 signal transducer and activator of transcription 5A  |
| 4 MTIF3    | 1.33    | 3e-17    | 2e-13 43 x 13 mitochondrial translational initiation factor 3      |
| 5 MIR195   | 1.19    | 7e-17    | 2e-13 45 x 30 novel transcript                                     |
| 6 CEP126   | 1.67    | 4e-16    | 8e-13 38 x 10 centrosomal protein 126                              |
| 7 SMIM20   | 1.59    | 4e-16    | 1e-12 37 x 1 small integral membrane protein 20                    |
| 8 PHLDB1   | 0.99    | 7e-16    | 1e-12 45 x 32 pleckstrin homology like domain family B member 1    |
| 9 ARHGAP24 | 1.61    | 8e-16    | 1e-12 45 x 12 Rho GTPase activating protein 24                     |
| 10 ADH5    | 1.06    | 1e-15    | 1e-12 44 x 12 alcohol dehydrogenase 5 (class III), chi polypeptide |

## Up-regulated in grade I

| Rank ID     | log(FC) | fdr      | Description                                           |
|-------------|---------|----------|-------------------------------------------------------|
|             | p-value | Metagene |                                                       |
| 1 226808_at | -1.89   | 7e-13    | 2e-08 3 x 7                                           |
| 2 244625_at | -1.89   | 1e-12    | 2e-08 2 x 7                                           |
| 3 238299_at | -1.7    | 3e-12    | 2e-08 1 x 13                                          |
| 4 XPO1      | -2.32   | 4e-12    | 2e-08 1 x 7 exportin 1                                |
| 5 238593_at | -3.27   | 5e-12    | 2e-08 1 x 7                                           |
| 6 232653_at | -3.58   | 1e-11    | 8e-08 1 x 2                                           |
| 7 LRRC1     | -2.48   | 2e-11    | 8e-08 1 x 4 leucine rich repeat containing 1          |
| 8 TRPS1     | -3.04   | 2e-11    | 8e-08 1 x 3 transcriptional repressor GATA binding 1  |
| 9 243963_at | -1.68   | 2e-11    | 8e-08 4 x 6                                           |
| 10 PAICS    | -1.37   | 3e-11    | 8e-08 15 x 8 phosphoribosylaminoimidazole carboxylase |

## Up-regulated in grade II

| Rank ID      | log(FC) | fdr      | Description                                |
|--------------|---------|----------|--------------------------------------------|
|              | p-value | Metagene |                                            |
| 1 1559491_at | -2.58   | 2e-20    | 6e-15 1 x 6                                |
| 2 COL10A1    | -3.26   | 4e-19    | 6e-15 1 x 3 collagen type X alpha 1 chain  |
| 3 COL10A1    | -2.97   | 5e-19    | 5e-14 1 x 3 collagen type X alpha 1 chain  |
| 4 235538_at  | -2.19   | 4e-18    | 5e-14 1 x 4                                |
| 5 221973_at  | -2.56   | 6e-18    | 5e-14 1 x 6 novel transcript               |
| 6 243329_at  | -2.19   | 7e-18    | 3e-13 1 x 7                                |
| 7 INHBA      | -3.15   | 5e-17    | 5e-13 1 x 4 inhibin subunit beta A         |
| 8 COL11A1    | -4.84   | 7e-17    | 5e-13 1 x 4 collagen type XI alpha 1 chain |
| 9 RNF213     | -2.49   | 8e-17    | 6e-13 1 x 8 ring finger protein 213        |
| 10 DENND1B   | -2.6    | 1e-16    | 6e-13 1 x 6 DENN domain containing 1B      |

## Up-regulated in grade III

| Rank ID      | log(FC) | fdr      | Description                                                      |
|--------------|---------|----------|------------------------------------------------------------------|
|              | p-value | Metagene |                                                                  |
| 1 242890_at  | -1.85   | 1e-21    | 1e-15 15 x 9                                                     |
| 2 221973_at  | -2.19   | 5e-20    | 1e-15 1 x 6 novel transcript                                     |
| 3 MPV17      | -0.94   | 1e-19    | 1e-15 15 x 6 mitochondrial inner membrane protein MPV17          |
| 4 TET3       | -2.13   | 2e-19    | 1e-15 15 x 10 tet methylcytosine dioxygenase 3                   |
| 5 1559491_at | -2.04   | 2e-19    | 2e-15 1 x 6                                                      |
| 6 KNOP1      | -1.52   | 3e-19    | 2e-15 15 x 7 lysine rich nucleolar protein 1                     |
| 7 BAIAP2L1   | -2.15   | 4e-19    | 1e-14 16 x 10 BAR/IMD domain containing adaptor protein 2 like 1 |
| 8 C6orf132   | -1.74   | 2e-18    | 1e-14 1 x 5 chromosome 6 open reading frame 132                  |
| 9 CGN        | -2.4    | 2e-18    | 1e-14 1 x 3 cingulin                                             |
| 10 PSRC1     | -1.86   | 3e-18    | 1e-14 16 x 10 proline and serine rich coiled-coil 1              |

Figure S6. Grade-dependent change of differential expression genes in breast cancer.

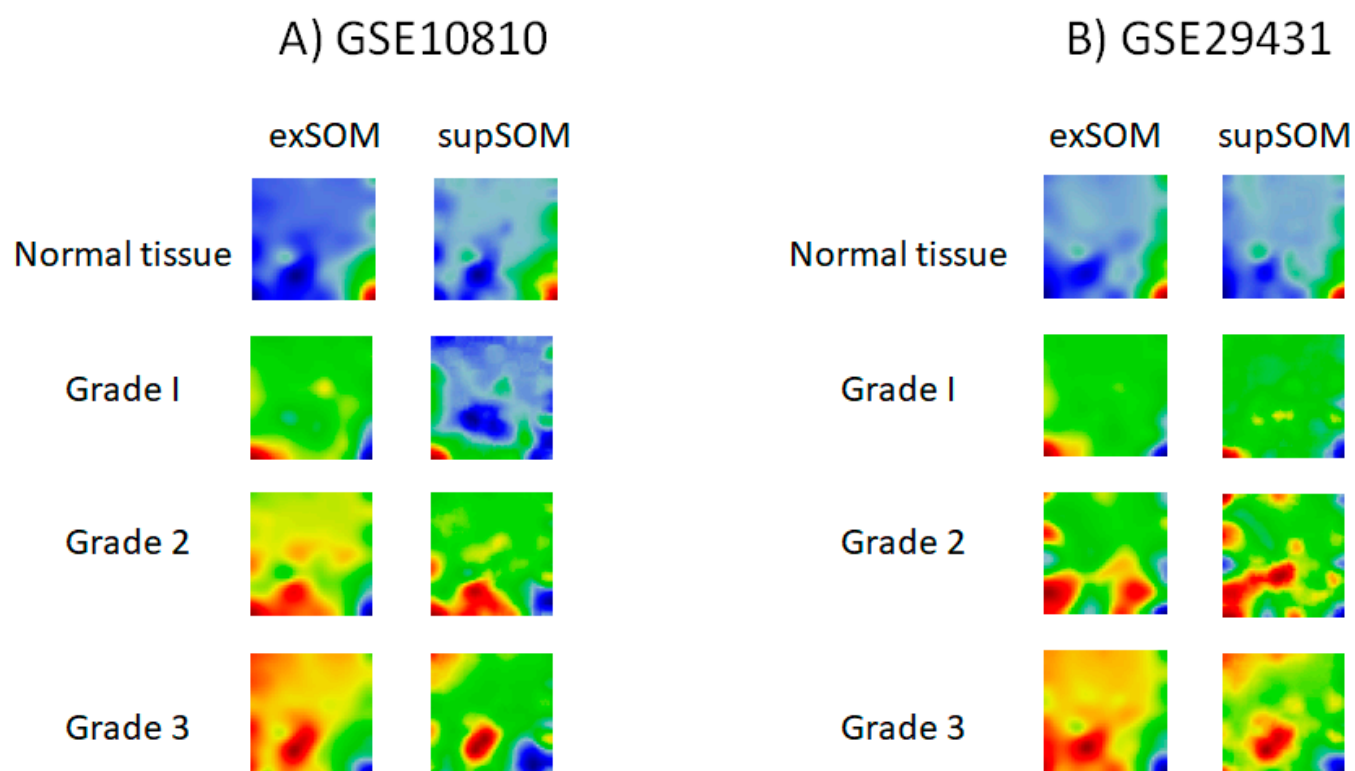

**Figure S7.** Comparison of exSOM and supSOM portraits in secondary breast cancer datasets. A) GSE10810, B) GSE29431.
